# Supplementary material for: Trimethylamine N-oxide–derived zwitterionic polymers: A new class of ultralow fouling bioinspired materials
Source: PubMed Central journal article supplement — Sci Adv. 2019 Jun 14;5(6):eaaw9562. doi: 10.1126/sciadv.aaw9562 (PMC6570511; doi:10.1126/sciadv.aaw9562), 2019-06-14
Supplement: aaw9562_SM.pdf [file aaw9562_SM.pdf]

## Supplementary Materials for

### **Trimethylamine *N*-oxide–derived zwitterionic polymers: A new class of ultralow fouling bioinspired materials**

Bowen Li, Priyesh Jain, Jinrong Ma, Josh K. Smith, Zhefan Yuan, Hsiang-Chieh Hung, Yuwei He, Xiaojie Lin, Kan Wu, Jim Pfaendtner, Shaoyi Jiang\*

\*Corresponding author. Email: [sjiang@uw.edu](mailto:sjiang@uw.edu)

Published 14 June 2019, *Sci. Adv.* **5**, eaaw9562 (2019)  
DOI: 10.1126/sciadv.aaw9562

#### **This PDF file includes:**

- Fig. S1.  $^1\text{H}$  NMR spectrum of TMAO monomer.
- Fig. S2. HRMS spectrum of TMAO monomer.
- Fig. S3. Cell adhesion test.
- Fig. S4. GPC graph of KLH, PEG<sub>10k</sub>-KLH, and TMAO-KLH conjugates.
- Fig. S5. GPC graph of native uricase, PEG<sub>10k</sub>-uricase, and TMAO-uricase conjugates.
- Fig. S6. Protein stability test.
- Table S1. Circulation time of uricase samples after repeated intravenous injections.

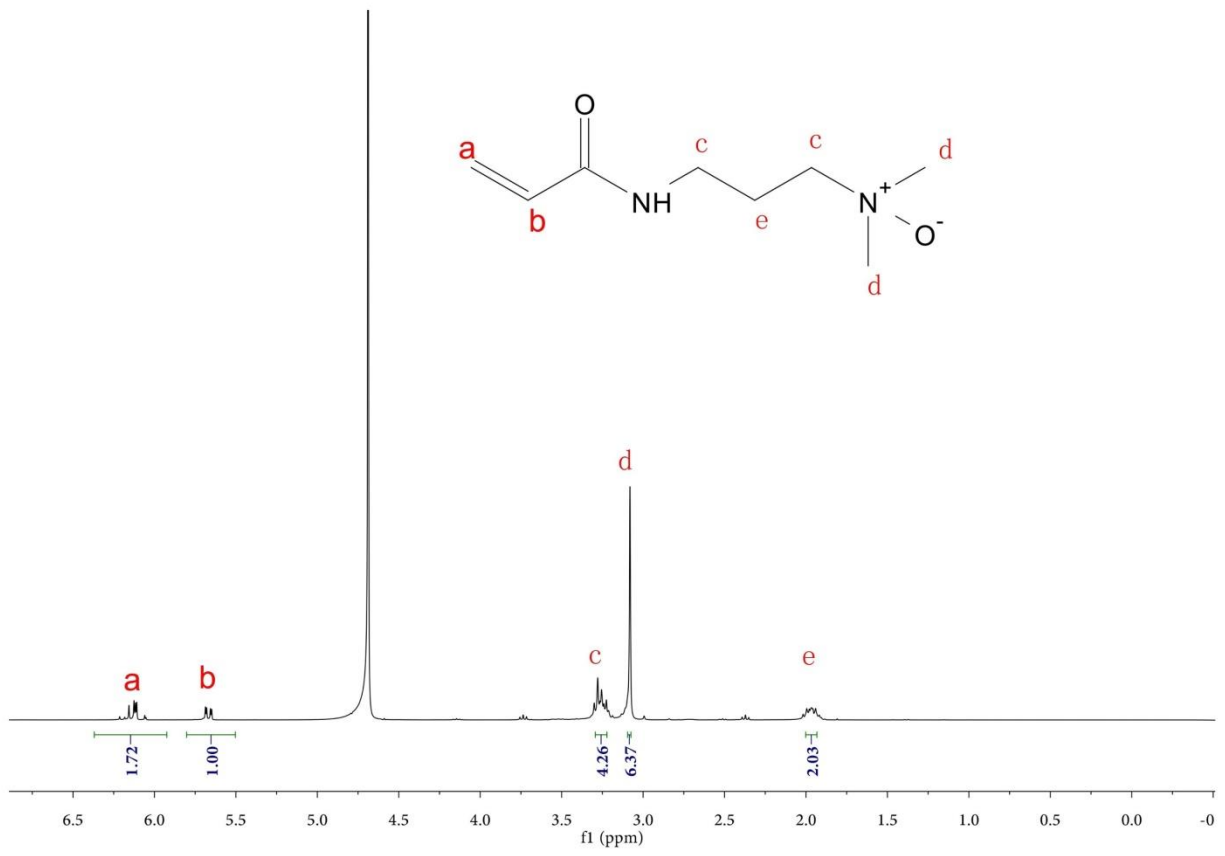

**Fig. S1. <sup>1</sup>H NMR spectrum of TMAO monomer.**

3\_13\_2019\_001 #13-19 RT: 0.22-0.30 AV: 7 NL: 2.11E8  
T: FTMS + p ESI Full ms [150.00-800.00]

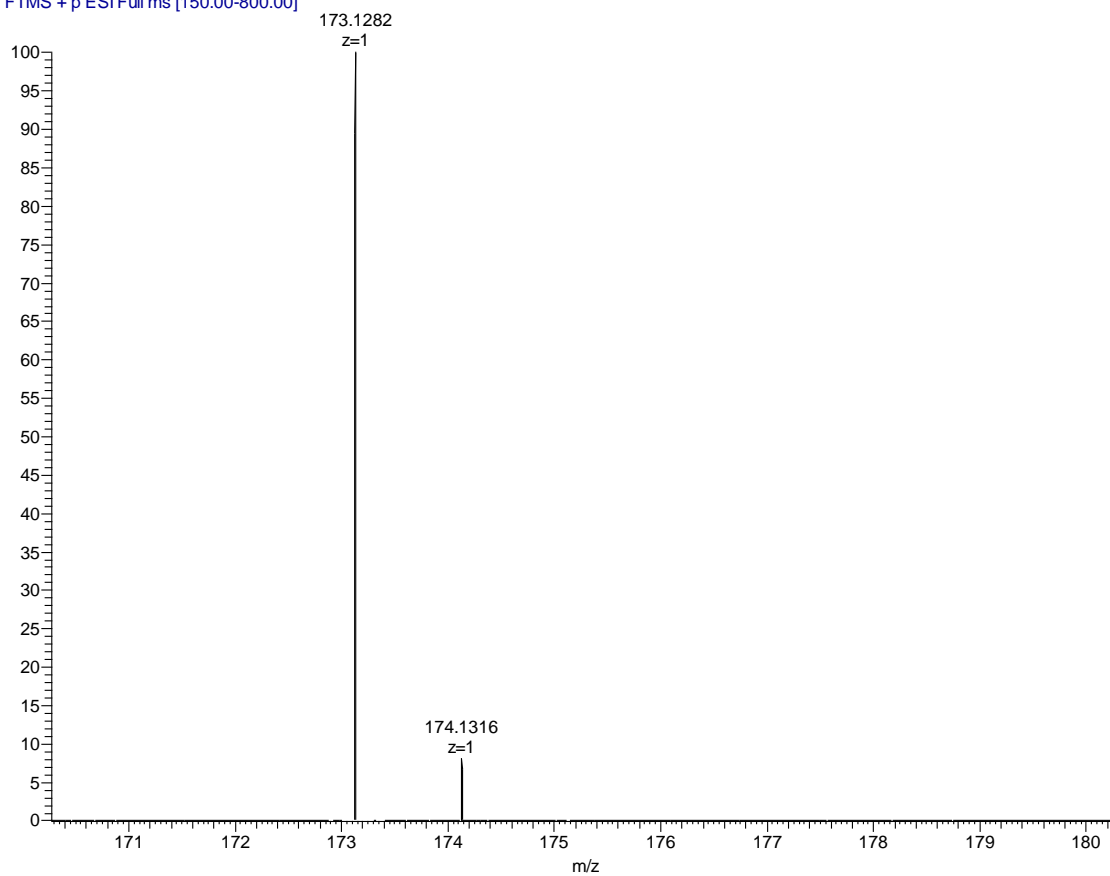

**Fig. S2. HRMS spectrum of TMAO monomer.**

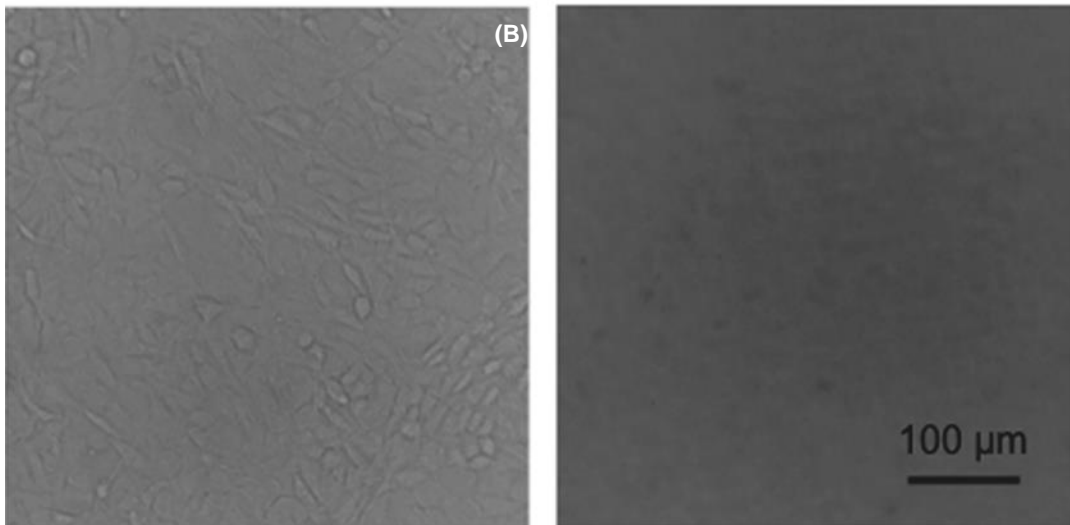

**Fig. S3. Cell adhesion test.** Representative photographs showing cell adhesion on TCPS (A) and TMAO (B) hydrogel surfaces.

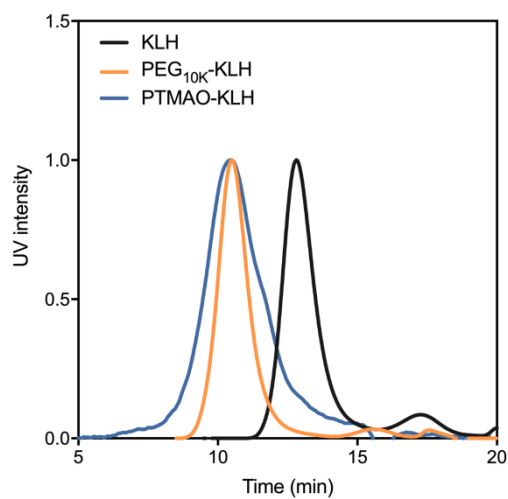

**Fig. S4. GPC graph of KLH, PEG<sub>10k</sub>-KLH and TMAO-KLH conjugates.**

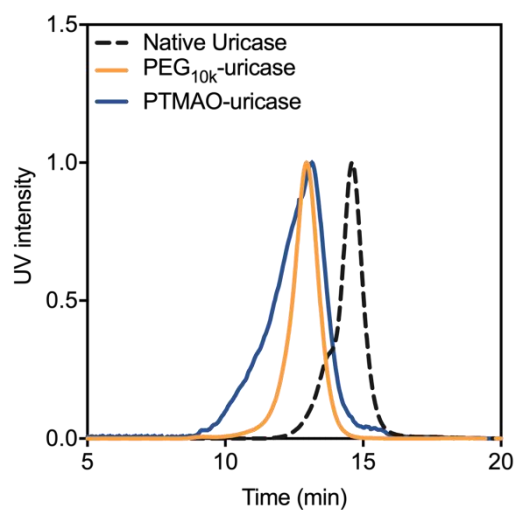

**Fig. S5. GPC graph of native uricase, PEG<sub>10k</sub>-uricase and TMAO-uricase conjugates.**

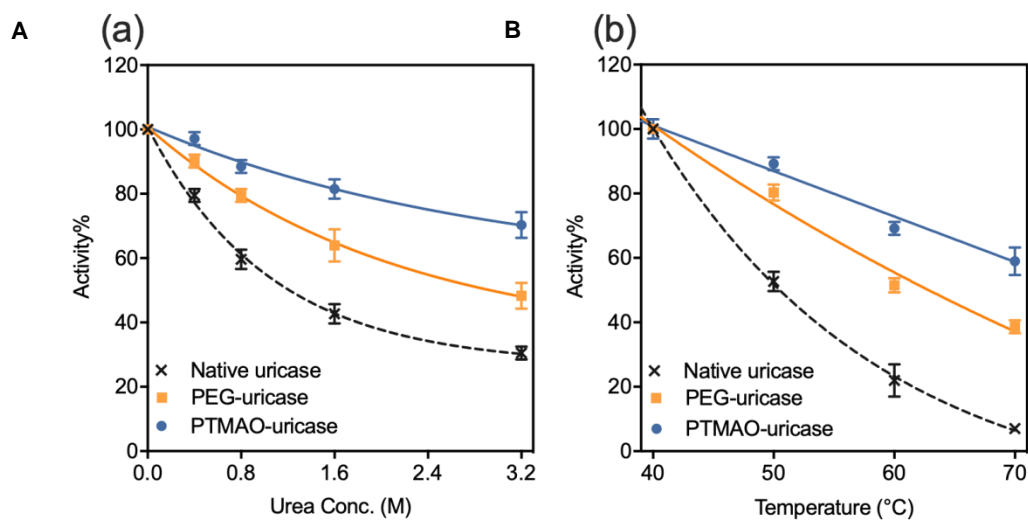

**Fig. S6. Protein stability test.** (a) Retained activity of uricase, PEG-uricase and PTMAO-uricase conjugates after incubation with urea (0-3.2M) for 6 hours; (b) Retained activity of uricase, PEG-uricase, PTMAO-conjugates after incubation at 40-70°C for 30min.

**Table S1. Circulation time of uricase samples after repeated intravenous injections.**

| Parameters \ Sample | Native uricase |     | PEG-uricase |      | TMAO-uricase |      |
|---------------------|----------------|-----|-------------|------|--------------|------|
|                     | 1              | 3   | 1           | 3    | 1            | 3    |
| Injection times     | 1              | 3   | 1           | 3    | 1            | 3    |
| $t_{1/2}$ (h)       | 3.9            | 1.9 | 16.2        | 10.1 | 19.1         | 18.2 |
